# Supplementary material for: One-Day Molecular Detection of Salmonella and Campylobacter in Chicken Meat: A Pilot Study
Source: MDPI journal article supplement (doi:10.3390/foods10051132), 2021-05-19
Supplement: s1 [file s1]

# One-Day Molecular Detection of *Salmonella* and *Campylobacter* in Chicken Meat: A Pilot Study

Andrea Zembrini <sup>1,2</sup>, Valentina Carta <sup>3</sup>, Virginia Filipello <sup>3,4,\*</sup>, Laura Ragni <sup>3</sup>, Elena Cosciani-Cunico <sup>3</sup>, Sara Arnaboldi <sup>3</sup>, Barbara Bertasi <sup>3</sup>, Niccolò Franceschi <sup>1</sup>, Paolo Ajmone-Marsan <sup>1</sup>, Dario De Medici <sup>5</sup> and Marina Nadia Losio <sup>3,4</sup>

<sup>1</sup> Department of Animal Science, Food and Nutrition—DIANA, Università Cattolica del Sacro Cuore. Via E. Parmense, 84, 29122 Piacenza, Italy; a.zembrini@unibs.it (A.Z.); niccolo.franceschi@unicatt.it (N.F.); paolo.ajmone@unicatt.it (P.A.-M.)

<sup>2</sup> Department of Molecular and Translational Medicine, University of Brescia. Viale Europa, 11, 25123 Brescia, Italy

<sup>3</sup> Department of Food Safety, Istituto Zooprofilattico della Lombardia e dell'Emilia Romagna. Via A. Bianchi, 9, 25124 Brescia, Italy; valentina.carta@izsler.it (V.C.); laura.ragni@izsler.it (L.R.); elena.coscianicunico@izsler.it (E.C.-C.); sara.arnaboldi@izsler.it (S.A.); barbara.bertasi@izsler.it (B.B.); marinanadia.losio@izsler.it (M.N.L.)

<sup>4</sup> National Reference Centre for Emerging Risks in Food Safety—CRESA, Istituto Zooprofilattico della Lombardia e dell'Emilia Romagna, Via G. Celoria, 12, 20133 Milan, Italy

<sup>5</sup> Department of Food Safety and Veterinary Public Health, Istituto Superiore di Sanità. Viale Regina Elena, 299, 00161 Rome, Italy; dario.demedici@iss.it

\* Correspondence: virginia.filipello@izsler.it; Tel.: +39-030-2290-781

## S1. Pathogen plate count

The following tables recap the results of pathogen plate count for *Salmonella* and *Campylobacter*. Results have been divided in 2 tables, one for each batch of minced chicken meat.

**Table S1a.** Plate Counts for *Salmonella* spp. Samples.

| Matrix.             | Initial Experimental Contamination (C.F.U./g) | Enrichment Time (h) | Rep | Plate count (Log C.F.U./mL) |         |
|---------------------|-----------------------------------------------|---------------------|-----|-----------------------------|---------|
|                     |                                               |                     |     | Batch 1                     | Batch 2 |
| Control broth       | 10 <sup>5</sup>                               | 0                   | 1   | 4.23                        | 5.23    |
|                     |                                               |                     | 2   | 4.34                        | 5.32    |
|                     |                                               |                     | 3   | 4.15                        | 5.32    |
|                     |                                               | 2                   | 1   | 5.04                        | 5.85    |
|                     |                                               |                     | 2   | 5.15                        | 5.79    |
|                     |                                               |                     | 3   | 5.18                        | 6.00    |
|                     |                                               | 4                   | 1   | 6.68                        | 7.85    |
|                     |                                               |                     | 2   | 6.61                        | 7.81    |
|                     |                                               |                     | 3   | 6.53                        | 7.81    |
|                     |                                               | 6                   | 1   | 8.20                        | 8.81    |
|                     |                                               |                     | 2   | 8.45                        | 8.74    |
|                     |                                               |                     | 3   | 8.40                        | 8.88    |
| Chicken minced meat | 10 <sup>1</sup>                               | 0                   | 1   | 1.46                        | 1.70    |
|                     |                                               |                     | 2   | 1.46                        | 1.46    |
|                     |                                               |                     | 3   | 1.46                        | 1.46    |
|                     |                                               | 2                   | 1   | 2.38                        | 1.88    |
|                     |                                               |                     | 2   | 2.48                        | 2.15    |
|                     |                                               |                     | 3   | 2.52                        | 1.93    |

|  |                 |                                        |   |       |       |
|--|-----------------|----------------------------------------|---|-------|-------|
|  | 10 <sup>3</sup> | 4                                      | 1 | 3.53  | 1.46  |
|  |                 |                                        | 2 | 3.62  | 2.64  |
|  |                 |                                        | 3 | 3.59  | 2.20  |
|  |                 | 6                                      | 1 | 5.79  | 4.48  |
|  |                 |                                        | 2 | 6.00  | 4.48  |
|  |                 |                                        | 3 | 6.00  | 4.48  |
|  |                 | 0                                      | 1 | 3.26  | 3.56  |
|  |                 |                                        | 2 | 3.41  | 3.48  |
|  |                 |                                        | 3 | 3.28  | 3.59  |
|  |                 | 2                                      | 1 | 4.49  | 4.00  |
|  |                 |                                        | 2 | 4.28  | 4.18  |
|  |                 |                                        | 3 | 4.73  | 4.04  |
|  | 10 <sup>5</sup> | 4                                      | 1 | 6.20  | 6.04  |
|  |                 |                                        | 2 | 6.51  | 6.20  |
|  |                 |                                        | 3 | 6.51  | 6.20  |
|  |                 | 6                                      | 1 | 8.08  | 7.48  |
|  |                 |                                        | 2 | 8.26  | 7.63  |
|  |                 |                                        | 3 | 8.23  | 7.58  |
|  |                 | 0                                      | 1 | 5.26  | 4.94  |
|  |                 |                                        | 2 | 5.15  | 4.81  |
|  |                 |                                        | 3 | 5.15  | 5.08  |
|  |                 | 2                                      | 1 | 6.57  | 5.28  |
|  |                 |                                        | 2 | 6.58  | 5.26  |
|  |                 |                                        | 3 | 6.32  | 5.45  |
|  | 10 <sup>5</sup> | 4                                      | 1 | 8.11  | 7.34  |
|  |                 |                                        | 2 | 8.08  | 7.18  |
|  |                 |                                        | 3 | 8.11  | 7.20  |
|  |                 | 6                                      | 1 | 9.61  | 8.77  |
|  |                 |                                        | 2 | 9.68  | 8.56  |
|  |                 |                                        | 3 | 9.64  | 8.68  |
|  |                 | 0                                      | 1 | <1.00 | <1.00 |
|  |                 |                                        | 2 | <1.00 | <1.00 |
|  |                 |                                        | 3 | <1.00 | <1.00 |
|  |                 | Negative control<br>(no contamination) | 1 | <1.00 | <1.00 |
|  |                 |                                        | 2 | <1.00 | <1.00 |
|  |                 |                                        | 3 | <1.00 | <1.00 |

**Table S1b.** Plate counts for *Campylobacter* spp. samples.

| Matrix        | Initial Experimental Contamination (C.F.U./g) | Enrichment Time (h) | Rep | Pathogen count (Log C.F.U./mL) |         |
|---------------|-----------------------------------------------|---------------------|-----|--------------------------------|---------|
|               |                                               |                     |     | Batch 1                        | Batch 2 |
| Control broth | 10 <sup>5</sup>                               | 0                   | 1   | 4.57                           | 4.67    |
|               |                                               |                     | 2   | 4.75                           | 4.69    |
|               |                                               |                     | 3   | 4.53                           | 4.78    |
|               |                                               | 2                   | 1   | 4.54                           | 4.63    |
|               |                                               |                     | 2   | 4.18                           | 4.43    |
|               |                                               |                     | 3   | 4.41                           | 4.54    |
|               |                                               | 4                   | 1   | 4.18                           | 4.18    |
|               |                                               |                     | 2   | 4.48                           | 4.23    |
|               |                                               |                     | 3   | 4.08                           | 4.38    |
|               |                                               | 6                   | 1   | 4.48                           | 4.34    |
|               |                                               |                     | 2   | 4.30                           | 4.51    |

|                                        |                 |                 |   |       |       |      |
|----------------------------------------|-----------------|-----------------|---|-------|-------|------|
| Chicken minced meat                    | 10 <sup>1</sup> | 0               | 3 | 4.54  | 4.71  |      |
|                                        |                 |                 | 1 | 2.15  | 2.36  |      |
|                                        |                 |                 | 2 | 2.11  | 2.43  |      |
|                                        |                 | 2               | 3 | 2.00  | 2.51  |      |
|                                        |                 |                 | 1 | 2.68  | 2.88  |      |
|                                        |                 |                 | 2 | 2.68  | 2.86  |      |
|                                        |                 | 4               | 3 | 2.81  | 2.54  |      |
|                                        |                 |                 | 1 | 2.69  | 2.41  |      |
|                                        |                 |                 | 2 | 2.82  | 2.30  |      |
|                                        |                 | 6               | 3 | 2.54  | 2.20  |      |
|                                        |                 |                 | 1 | 3.26  | 2.88  |      |
|                                        |                 |                 | 2 | 3.15  | 3.01  |      |
|                                        |                 | 10 <sup>3</sup> | 0 | 3     | 3.08  | 2.51 |
|                                        |                 |                 |   | 1     | 2.00  | 2.51 |
|                                        |                 |                 |   | 2     | 2.15  | 2.60 |
|                                        |                 |                 | 2 | 3     | 1.85  | 2.51 |
|                                        |                 |                 |   | 1     | 2.91  | 2.59 |
|                                        |                 |                 |   | 2     | 3.00  | 2.81 |
|                                        | 4               |                 | 3 | 2.80  | 2.46  |      |
|                                        |                 |                 | 1 | 3.08  | 3.00  |      |
|                                        |                 |                 | 2 | 3.23  | 2.32  |      |
|                                        | 10 <sup>5</sup> | 6               | 3 | 3.15  | 3.08  |      |
|                                        |                 |                 | 1 | 3.40  | 3.20  |      |
|                                        |                 |                 | 2 | 3.48  | 3.18  |      |
|                                        |                 | 10 <sup>3</sup> | 0 | 3     | 3.54  | 2.91 |
|                                        |                 |                 |   | 1     | 5.00  | 4.40 |
|                                        |                 |                 |   | 2     | 4.43  | 4.32 |
|                                        |                 |                 | 2 | 3     | 4.82  | 4.60 |
|                                        |                 |                 |   | 1     | 4.67  | 4.62 |
|                                        |                 |                 |   | 2     | 4.75  | 4.53 |
|                                        | 4               |                 | 3 | 5.18  | 4.73  |      |
|                                        |                 |                 | 1 | 5.28  | 4.64  |      |
|                                        |                 |                 | 2 | 5.04  | 4.74  |      |
|                                        | 10 <sup>5</sup> | 6               | 3 | 5.20  | 5.11  |      |
|                                        |                 |                 | 1 | 5.30  | 4.72  |      |
|                                        |                 |                 | 2 | 5.04  | 5.08  |      |
| Negative control<br>(no contamination) |                 | 0               | 3 | 5.26  | 5.18  |      |
|                                        |                 |                 | 1 | <0.30 | <0.30 |      |
|                                        |                 |                 | 2 | <0.30 | <0.30 |      |
|                                        |                 |                 | 3 | <0.30 | <0.30 |      |

## S2. Colorimetric LAMP inclusivity test

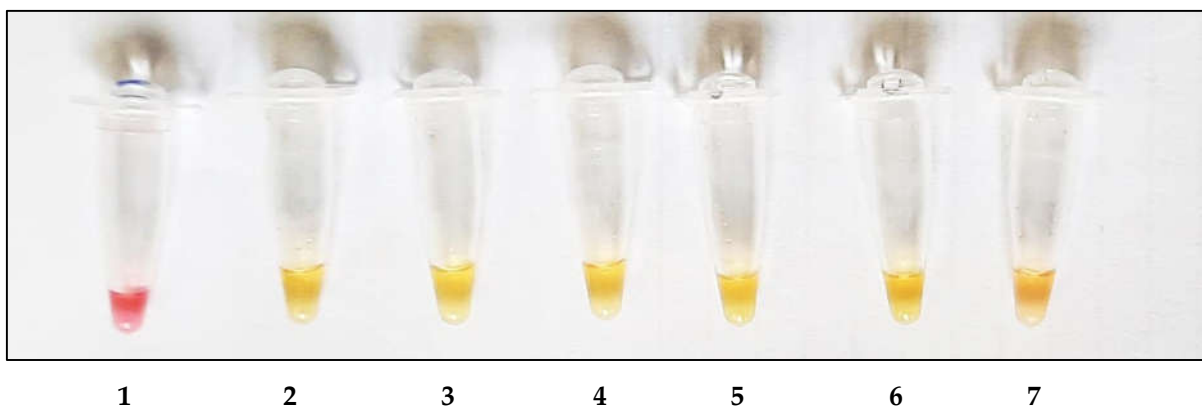

**Figure S1a.** LAMP inclusivity test for *Salmonella* spp. detection. The sample positivity is verified observing the change of color of the mix (from red to yellow). Legend: 1 = Negative control; 2 = *S. Typhimurium* ATCC 6994; 3 = *S. Enteritidis* ATCC 13076; *S. Infantis* NCTC 6703; field samples: 4 = *S. Derby*; 5 = *S. Newport*; 6 = *S. Anatum*; 7 = *S. Typhimurium* monophasic variant.

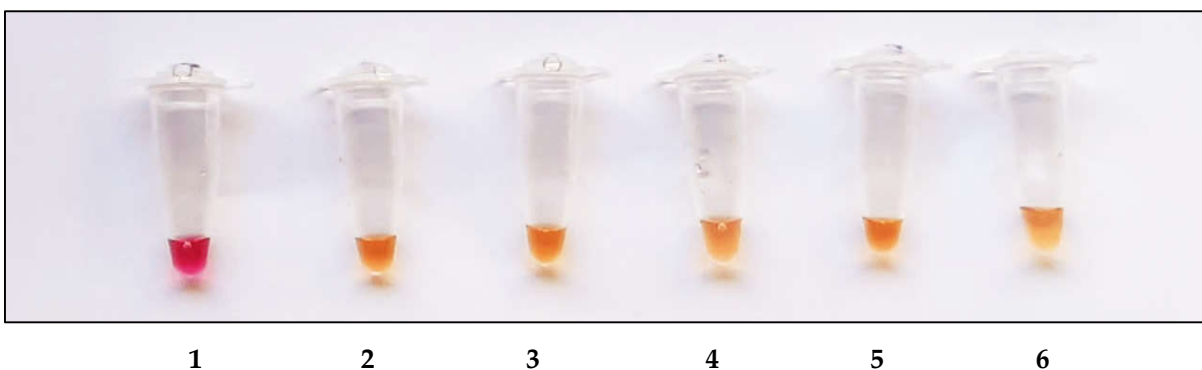

**Figure S1b.** LAMP inclusivity test for *Campylobacter* spp. detection. The sample positivity is verified observing the change of color of the mix (from red to yellow). Legend: 1 = Negative control; 2 = ATCC 43478; 3 = ATCC 49913; 4 = ATCC 33291; 5–6 = *Campylobacter* spp. field samples.

### S3. Summary of RT-PCR and colorimetric LAMP results

The following table summarizes and compares the results of RT-PCR and colorimetric LAMP we performed in the study.

**Table S2.** Summary of the results regarding RT-PCR and colorimetric LAMP analysis of chicken minced meat samples contaminated with *Salmonella* and *Campylobacter*.

| <i>Salmonella</i> spp.    |                             |                             |                             |
|---------------------------|-----------------------------|-----------------------------|-----------------------------|
|                           | colorimetric LAMP           |                             | RT-PCR                      |
| Time                      | 30 min                      | 45 min                      | 90 min                      |
| Samples detected          | 78/96 (81.3%)               | 93/96 (96.9%)               | 89/96 (92.7%)               |
| LOD batch 1               | 10 <sup>1</sup> C.F.U./g T6 | 10 <sup>1</sup> C.F.U./g T0 | 10 <sup>1</sup> C.F.U./g T6 |
| LOD batch 2               | 10 <sup>1</sup> C.F.U./g T4 | 10 <sup>1</sup> C.F.U./g T2 | 10 <sup>1</sup> C.F.U./g T4 |
| <i>Campylobacter</i> spp. |                             |                             |                             |
|                           | colorimetric LAMP           |                             | RT-PCR                      |
| Time                      | 30 min                      | 45 min                      | 90 min                      |
| Samples detected          | 71/96 (74%)                 | 82/96 (85.4%)               | 71/96 (74%)                 |
| LOD batch 1               | 10 <sup>3</sup> C.F.U./g T0 | 10 <sup>1</sup> C.F.U./g T4 | 10 <sup>3</sup> C.F.U./g T0 |
| LOD batch 2               | 10 <sup>3</sup> C.F.U./g T0 | 10 <sup>3</sup> C.F.U./g T0 | 10 <sup>3</sup> C.F.U./g T0 |

### S4. RT-PCR datasets

The following tables contains the RT-PCR data used to generate the graphs showed in Figure 3 and 5 respectively.

**Table S3a.** Dataset used to plot the graphs showed in Figure 3.

| <i>Salmonella</i>        |   |                |       |                |       |
|--------------------------|---|----------------|-------|----------------|-------|
|                          |   | <i>Batch 1</i> |       | <i>Batch 2</i> |       |
| Sample                   | T | $\Delta$ Ct    | Avg   | $\Delta$ Ct    | Avg   |
| Broth (C <sup>+</sup> )  | 0 | 30.12          | 30.19 | 24.34          | 25.00 |
|                          |   | 30.1           |       | 25.54          |       |
|                          |   | 30.01          |       | 25.12          |       |
|                          | 2 | 26.44          | 26.59 | 24.81          | 24.86 |
|                          |   | 26.68          |       | 24.78          |       |
|                          |   | 26.65          |       | 24.98          |       |
|                          | 4 | 24.25          | 24.48 | 19.49          | 18.60 |
|                          |   | 24.24          |       | 18.72          |       |
|                          |   | 24.94          |       | 17.58          |       |
|                          | 6 | 23.57          | 23.31 | 16.85          | 17.40 |
|                          |   | 22.65          |       | 17.82          |       |
|                          |   | 23.71          |       | 17.54          |       |
| 10 <sup>1</sup> C.F.U./g | 0 | NA             | 37.47 | NA             | NA    |
|                          |   | 37.83          |       | NA             |       |
|                          |   | 37.11          |       | NA             |       |
|                          | 2 | 38.13          | 38.01 | NA             | NA    |
|                          |   | 38.33          |       | NA             |       |
|                          |   | 37.57          |       | NA             |       |
|                          | 4 | 33.5           | 33.14 | 36.67          | 36.31 |
|                          |   | 33.23          |       | 34.7           |       |
|                          |   | 32.69          |       | 37.58          |       |
|                          | 6 | 29.38          | 29.23 | 31.33          | 32.68 |
|                          |   | 29.18          |       | 33.34          |       |
|                          |   | 29.13          |       | 33.38          |       |

|                          |   |       |       |       |       |
|--------------------------|---|-------|-------|-------|-------|
| 10 <sup>3</sup> C.F.U./g | 0 | 33.97 | 33.60 | 32.37 | 34.08 |
|                          |   | 33.9  |       | 35.22 |       |
|                          |   | 33.15 |       | 34.65 |       |
|                          | 2 | 32.06 | 31.94 | 32.7  | 32.55 |
|                          |   | 32.37 |       | 30.14 |       |
|                          |   | 31.4  |       | 34.81 |       |
|                          | 4 | 25.64 | 26.70 | 26.32 | 27.36 |
|                          |   | 26.83 |       | 27.04 |       |
|                          |   | 27.62 |       | 28.73 |       |
|                          | 6 | 23.46 | 23.70 | 22.11 | 22.61 |
|                          |   | 24.14 |       | 22.67 |       |
|                          |   | 23.51 |       | 23.06 |       |
| 10 <sup>5</sup> C.F.U./g | 0 | 31.07 | 30.99 | 30.98 | 31.04 |
|                          |   | 31.22 |       | 31.12 |       |
|                          |   | 30.68 |       | 31.03 |       |
|                          | 2 | 25.39 | 25.20 | 30.04 | 28.74 |
|                          |   | 25.62 |       | 27.32 |       |
|                          |   | 24.58 |       | 28.85 |       |
|                          | 4 | 25.3  | 25.26 | 23.04 | 23.37 |
|                          |   | 25.15 |       | 23.86 |       |
|                          |   | 25.28 |       | 23.2  |       |
|                          | 6 | 22.86 | 22.67 | 20.6  | 19.62 |
|                          |   | 22.28 |       | 19.01 |       |
|                          |   | 22.88 |       | 19.24 |       |

**Table S3b.** Dataset used to plot the graphs showed in Figure 5.

| <i>Campylobacter</i>     |   |                |       |                |       |
|--------------------------|---|----------------|-------|----------------|-------|
| Sample                   | T | <i>Batch 1</i> |       | <i>Batch 2</i> |       |
|                          |   | $\Delta$ Ct    | Avg   | $\Delta$ Ct    | Avg   |
| Broth (C <sup>+</sup> )  | 0 | 25.66          | 25.54 | 31.51          | 31.34 |
|                          |   | 25.48          |       | 31.5           |       |
|                          |   | 25.48          |       | 31.01          |       |
|                          | 2 | 25.33          | 25.48 | 31.21          | 31.08 |
|                          |   | 25.45          |       | 31.21          |       |
|                          |   | 25.67          |       | 30.82          |       |
|                          | 4 | 25.27          | 25.33 | 31.36          | 31.29 |
|                          |   | NA             |       | 31.28          |       |
|                          |   | 25.39          |       | 31.23          |       |
|                          | 6 | 25.4           | 25.41 | 31.17          | 31.18 |
|                          |   | 25.41          |       | 31.31          |       |
|                          |   | 25.41          |       | 31.07          |       |
| 10 <sup>1</sup> C.F.U./g | 0 | 27.33          | NA    | NA             | NA    |
|                          |   | NA             |       | NA             |       |
|                          |   | NA             |       | NA             |       |
|                          | 2 | NA             | NA    | NA             | NA    |
|                          |   | NA             |       | NA             |       |
|                          |   | NA             |       | NA             |       |
|                          | 4 | NA             | NA    | NA             | NA    |
|                          |   | NA             |       | NA             |       |
|                          |   | NA             |       | NA             |       |

|                          |   |       |       |       |       |
|--------------------------|---|-------|-------|-------|-------|
|                          | 6 | NA    | NA    | NA    | NA    |
|                          |   | NA    |       | NA    |       |
|                          |   | NA    |       | NA    |       |
| 10 <sup>3</sup> C.F.U./g | 0 | 34.72 | 35.66 | 36.91 | 37.59 |
|                          |   | 35.92 |       | 37.71 |       |
|                          |   | 36.34 |       | 38.16 |       |
|                          | 2 | 35.28 | 35.57 | 37.89 | 37.63 |
|                          |   | 36.02 |       | 38.9  |       |
|                          |   | 35.41 |       | 36.09 |       |
|                          | 4 | 35.73 | 35.08 | 38.65 | 38.23 |
|                          |   | 34.48 |       | 37.82 |       |
|                          |   | 35.03 |       | N/A   |       |
|                          | 6 | 34.24 | 36.08 | 37.71 | 38.13 |
|                          |   | 38.25 |       | 37.17 |       |
|                          |   | 35.75 |       | 39.5  |       |
| 10 <sup>5</sup> C.F.U./g | 0 | 29.2  | 29.48 | 32.54 | 32.41 |
|                          |   | 29.74 |       | 32.48 |       |
|                          |   | 29.51 |       | 32.22 |       |
|                          | 2 | 26.47 | 27.90 | 32.55 | 32.64 |
|                          |   | 28.57 |       | 32.61 |       |
|                          |   | 28.65 |       | 32.75 |       |
|                          | 4 | 27.1  | 27.40 | 32.46 | 32.38 |
|                          |   | 27.56 |       | 32.46 |       |
|                          |   | 27.55 |       | 32.21 |       |
|                          | 6 | 31    | 28.43 | 32.51 | 32.31 |
|                          |   | 28.06 |       | 32.2  |       |
|                          |   | 26.23 |       | 32.21 |       |

### S5. Colorimetric LAMP panels

In this section, the whole data regarding colorimetric LAMP are reported. Each batch of contaminated chicken minced meat was tested for the presence of *Salmonella* or *Campylobacter* DNA using short (30 min) and long (45 min) colorimetric LAMP reaction. Each positive sample was measured in triplicate, with a total of 96 measurements per batch.

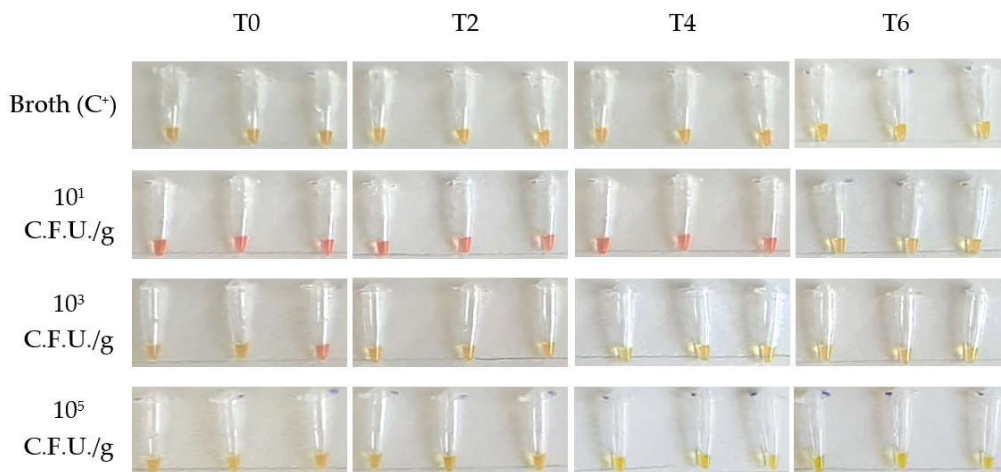

*Salmonella*, batch 1, 30-minutes

**Figure S2.** Detection of *Salmonella* DNA in the first batch of contaminated chicken meat using 30-minutes-long colorimetric LAMP. The panel shows all the 96 samples of the batch. Negative samples are red, positive samples are yellow.

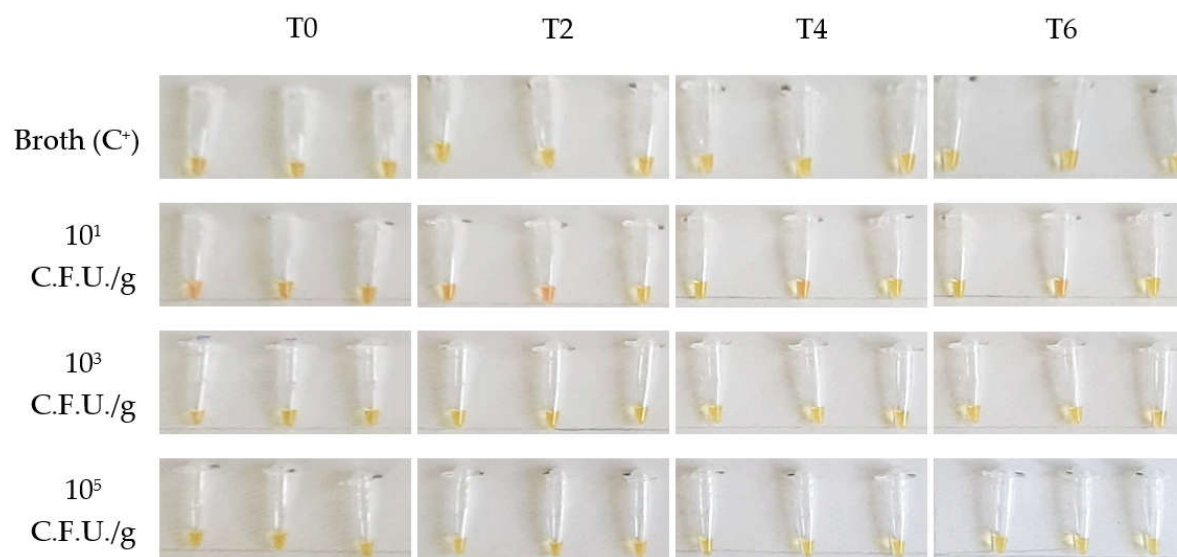

***Salmonella*, batch 1, 45-minutes**

**Figure S3.** Detection of *Salmonella* DNA in the first batch of contaminated chicken meat using 45-minutes-long colorimetric LAMP. The panel shows all the 96 samples of the batch. Negative samples are red, positive samples are yellow.

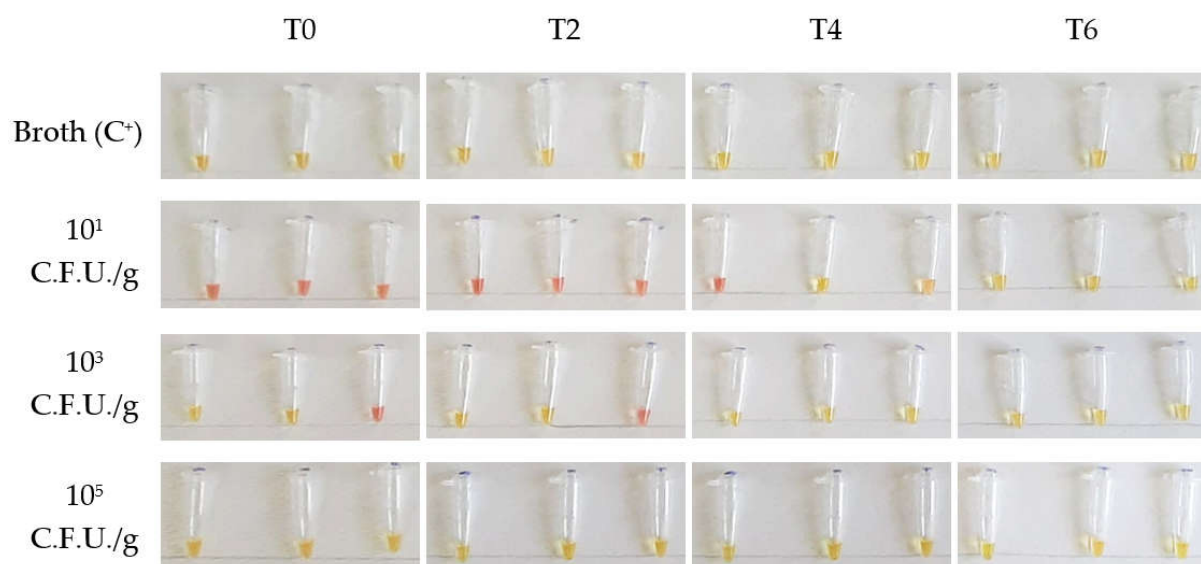

***Salmonella*, batch 2, 30-minutes**

**Figure S4.** Detection of *Salmonella* DNA in the second batch of contaminated chicken meat using 30-minutes-long colorimetric LAMP. The panel shows all the 96 samples of the batch. Negative samples are red, positive samples are yellow.



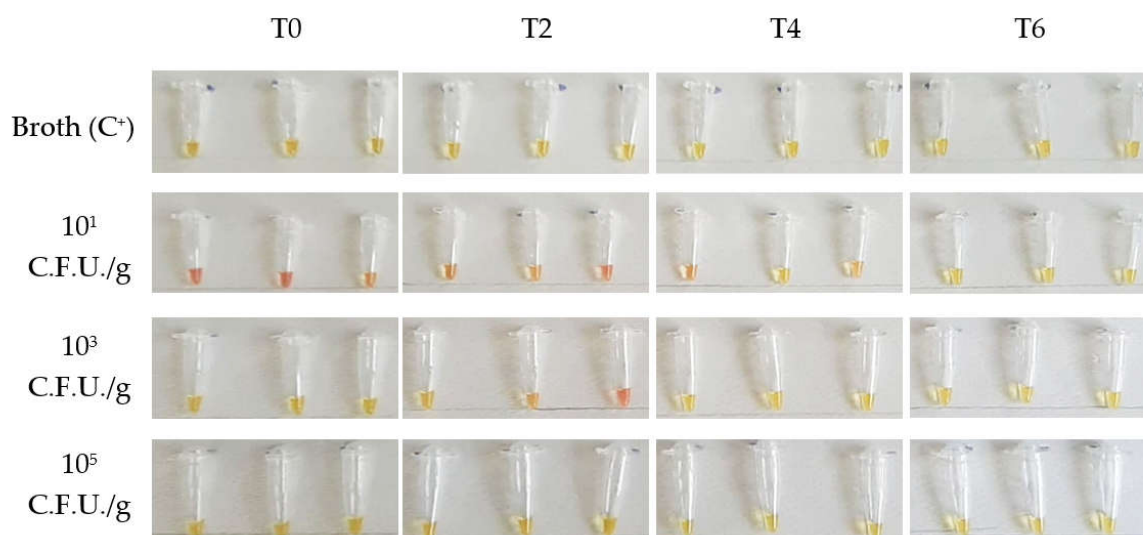

***Salmonella*, batch 2, 45-minutes**

**Figure S5.** Detection of *Salmonella* DNA in the second batch of contaminated chicken meat using 45-minutes-long colorimetric LAMP. The panel shows all the 96 samples of the batch. Negative samples are red, positive samples are yellow.

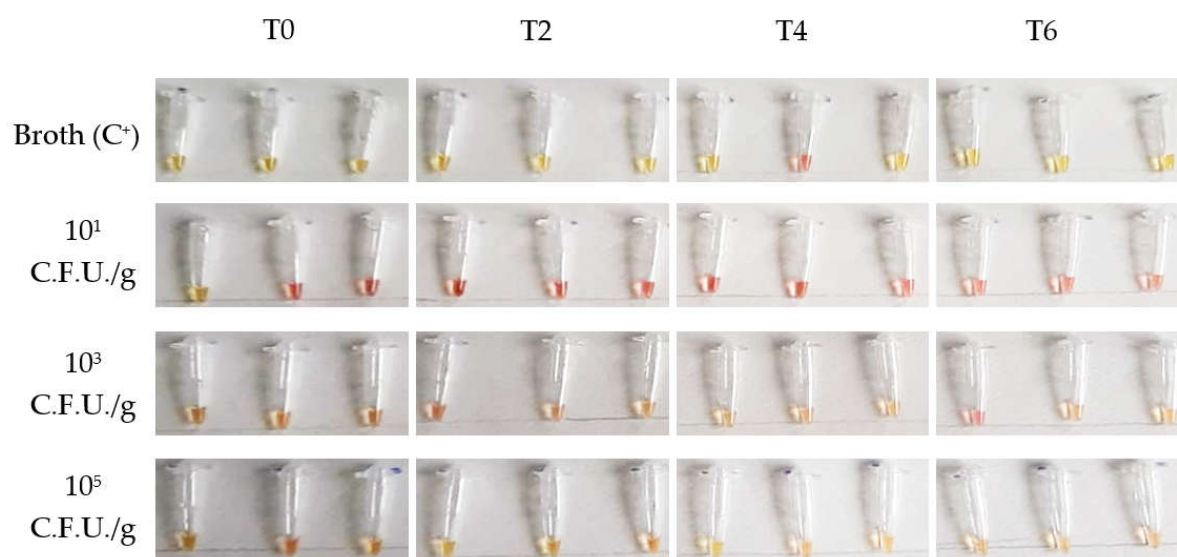

***Campylobacter*, batch 1, 30-minutes LAMP**

**Figure S6.** Detection of *Campylobacter* spp. DNA in the first batch of contaminated chicken meat using 30-minutes-long colorimetric LAMP. The panel shows all the 96 samples of the batch. Negative samples are red, positive samples are yellow.

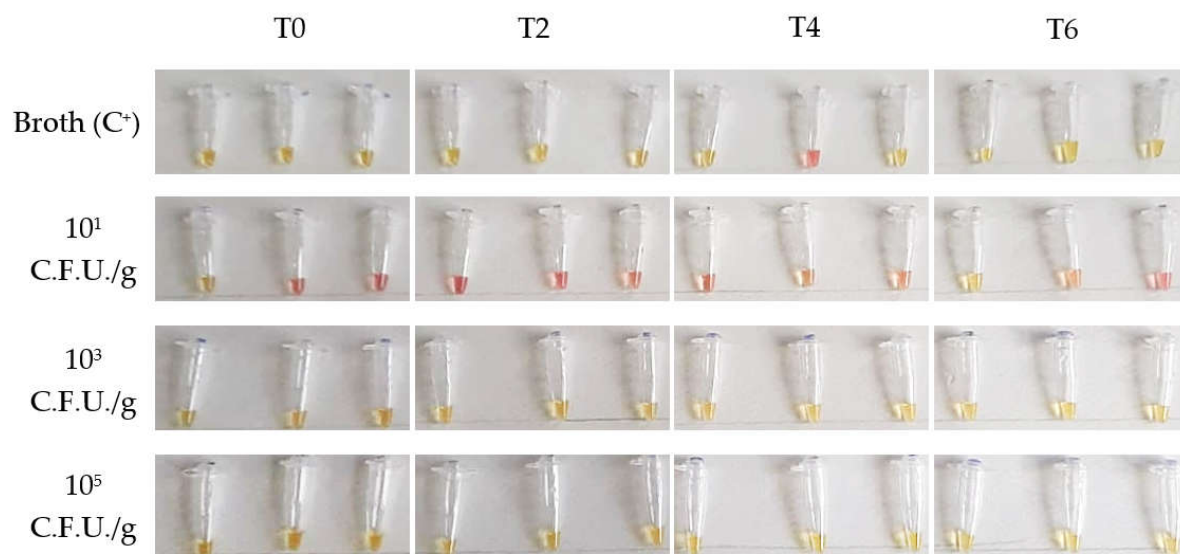

***Campylobacter*, batch 1, 45-minutes LAMP**

**Figure S7.** Detection of *Campylobacter* spp. DNA in the second batch of contaminated chicken meat using 45- minutes-long colorimetric LAMP. The panel shows all the 96 samples of the batch. Negative samples are red, positive samples are yellow.

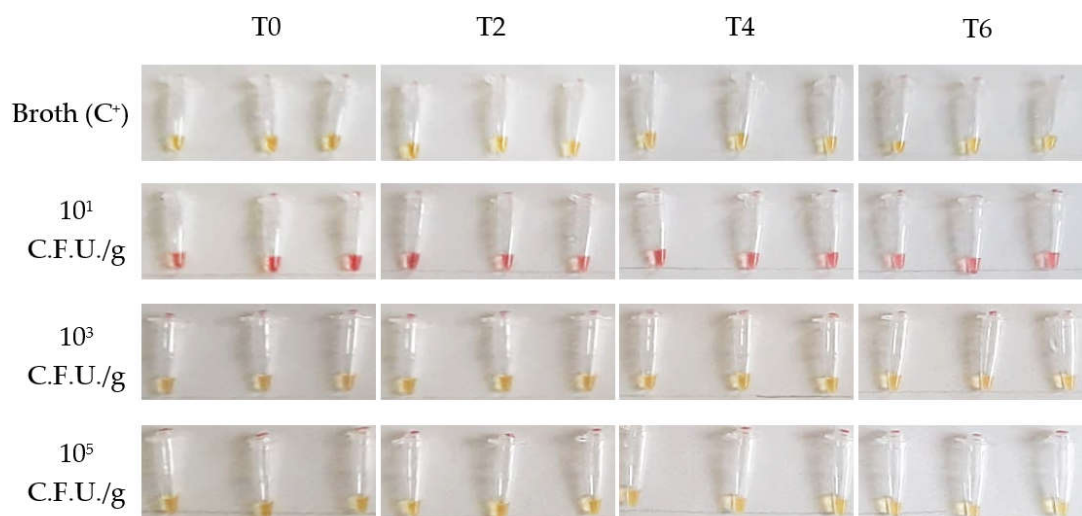

***Campylobacter*, batch 2, 30-minutes LAMP**

**Figure S8.** Detection of *Campylobacter* spp. DNA in the second batch of contaminated chicken meat using 30- minutes-long colorimetric LAMP. The panel shows all the 96 samples of the batch. Negative samples are red, positive samples are yellow.

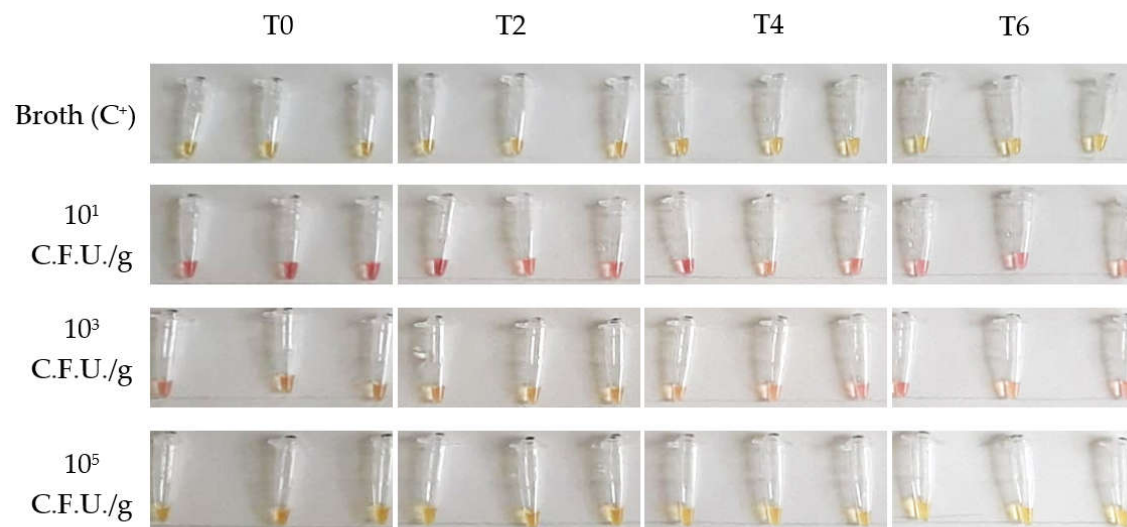

***Campylobacter*, batch 2, 45-minutes LAMP**

**Figure S9.** Detection of *Campylobacter* spp. DNA in the second batch of contaminated chicken meat using 40- minutes-long colorimetric LAMP. The panel shows all the 96 samples of the batch. Negative samples are red, positive samples are yellow.
